# Supplementary material for: ds-Block metal ions catalyzed decarboxylation of pyrazine-2,3,5,6-tetracarboxylic acid and the complexes obtained from hydrothermal reactions and novel water clusters
Source: Royal Society of Chemistry journal article supplement (doi:10.1039/b911939f), 2009-01-01
Supplement: b911939f.pdf [file b911939f.pdf]

## **SUPPORTING INFORMATION**

### ***ds*-block metal ions catalyzed decarboxylation of pyrazine-2,3,5,6-tetracarboxylic acid and the complexes obtained from hydrothermal reactions and novel water clusters**

Ai-Hong Yang<sup>1</sup>, Ying-Ping Quan<sup>1</sup>, Hong-Ling Gao<sup>1</sup>, Su-Rong Fang<sup>1</sup>, Yan-Ping Zhang<sup>1</sup>,  
Li-Hua Zhao<sup>1</sup>, Jian-Zhong Cui<sup>1\*</sup>, Jian-Hui Wang<sup>1</sup>, Wei Shi<sup>a</sup> and Peng Cheng<sup>a\*</sup>

<sup>1</sup> Department of Chemistry, Tianjin University, Tianjin 300072, P. R. China

<sup>a</sup> Department of Chemistry, Nankai University, Tianjin 300071, P. R. China

\* Author to whom correspondence should be addressed. Email: [cuijianzhong@tju.edu.cn](mailto:cuijianzhong@tju.edu.cn)

S1-S4: Selected bond lengths (Å) and angles (°) for **1-8**.

S5-S8: Hydrogen-bonding contacts in water clusters of complexes **1, 2, 4** and **5**.

S9-S10: Hydrogen-bonding contacts of complexes **7** and **8**.

S11: Crystal structures of **1** and **2** showing  $\pi \cdots \pi$  interactions (dashed lines).

S12: Crystal structure of **3** showing  $\pi \cdots \pi$  interactions (dashed lines).

S13: Crystal structure of **5** showing  $\pi \cdots \pi$  interactions.

**S1. Selected bond lengths (Å) and angles (°) for 1 and 2**

| <b>1</b>        |            | <b>2</b>        |            |
|-----------------|------------|-----------------|------------|
| Zn(1)-O(1)      | 2.108(4)   | Zn(1)-O(3)      | 2.057(2)   |
| Zn(1)-N(5)      | 2.123(4)   | Zn(1)-N(3)      | 2.102(3)   |
| Zn(1)-N(2)      | 2.129(4)   | Zn(1)-N(4)      | 2.118(3)   |
| Zn(1)-N(4)      | 2.148(4)   | Zn(1)-N(2)      | 2.153(3)   |
| Zn(1)-N(3)      | 2.152(4)   | Zn(1)-N(5)      | 2.177(3)   |
| Zn(1)-N(1)      | 2.230(4)   | Zn(1)-N(1)      | 2.332(3)   |
| O(1)-Zn(1)-N(5) | 95.90(17)  | O(3)-Zn(1)-N(3) | 168.82(11) |
| O(1)-Zn(1)-N(2) | 92.26(15)  | O(3)-Zn(1)-N(4) | 91.99(11)  |
| N(5)-Zn(1)-N(2) | 167.86(17) | N(3)-Zn(1)-N(4) | 99.06(11)  |
| O(1)-Zn(1)-N(4) | 166.80(16) | O(3)-Zn(1)-N(2) | 90.66(11)  |
| N(5)-Zn(1)-N(4) | 78.13(17)  | N(3)-Zn(1)-N(2) | 78.76(11)  |
| N(2)-Zn(1)-N(4) | 95.62(16)  | N(4)-Zn(1)-N(2) | 169.44(11) |
| O(1)-Zn(1)-N(3) | 90.09(15)  | O(3)-Zn(1)-N(5) | 86.76(10)  |
| N(5)-Zn(1)-N(3) | 92.49(16)  | N(3)-Zn(1)-N(5) | 96.98(11)  |
| N(2)-Zn(1)-N(3) | 78.50(16)  | N(4)-Zn(1)-N(5) | 78.72(11)  |
| N(4)-Zn(1)-N(3) | 101.84(16) | N(2)-Zn(1)-N(5) | 91.24(11)  |
| O(1)-Zn(1)-N(1) | 76.26(15)  | O(3)-Zn(1)-N(1) | 75.51(10)  |
| N(5)-Zn(1)-N(1) | 93.89(16)  | N(3)-Zn(1)-N(1) | 101.19(10) |
| N(2)-Zn(1)-N(1) | 96.77(16)  | N(4)-Zn(1)-N(1) | 97.63(11)  |
| N(4)-Zn(1)-N(1) | 92.27(16)  | N(2)-Zn(1)-N(1) | 92.93(11)  |
| N(3)-Zn(1)-N(1) | 165.45(16) | N(5)-Zn(1)-N(1) | 161.82(11) |

**S2. Selected bond lengths (Å) and angles (°) for 3 and 4**

| <b>3</b>                                   |            | <b>4</b>        |            |
|--------------------------------------------|------------|-----------------|------------|
| Zn(1)-O(1)                                 | 2.0680(14) | Cu(1)-N(5)      | 1.993(3)   |
| Zn(1)-N(3)                                 | 2.1184(18) | Cu(1)-N(2)      | 2.007(3)   |
| Zn(1)-O(4) <sup>i</sup>                    | 2.1188(15) | Cu(1)-N(3)      | 2.115(3)   |
| Zn(1)-O(5)                                 | 2.1675(16) | Cu(1)-N(1)      | 2.189(3)   |
| Zn(1)-N(2)                                 | 2.1761(18) | Cu(1)-N(4)      | 2.198(4)   |
| Zn(1)-N(1) <sup>i</sup>                    | 2.2538(17) | Cu(1)-O(1)      | 2.255(3)   |
| O(1)-Zn(1)-N(3)                            | 94.96(6)   | N(5)-Cu(1)-N(2) | 170.86(14) |
| O(1)-Zn(1)-O(4) <sup>i</sup>               | 171.15(6)  | N(5)-Cu(1)-N(3) | 92.16(13)  |
| N(3)-Zn(1)-O(4) <sup>i</sup>               | 87.69(6)   | N(2)-Cu(1)-N(3) | 80.82(13)  |
| O(1)-Zn(1)-O(5)                            | 88.89(6)   | N(5)-Cu(1)-N(1) | 92.32(12)  |
| N(3)-Zn(1)-O(5)                            | 102.84(7)  | N(2)-Cu(1)-N(1) | 96.05(12)  |
| O(4) <sup>i</sup> -Zn(1)-O(5)              | 82.29(6)   | N(3)-Cu(1)-N(1) | 163.46(13) |
| O(1)-Zn(1)-N(2)                            | 97.16(6)   | N(5)-Cu(1)-N(4) | 79.44(14)  |
| N(3)-Zn(1)-N(2)                            | 77.04(7)   | N(2)-Cu(1)-N(4) | 96.48(13)  |
| O(4) <sup>i</sup> -Zn(1)-N(2)              | 91.66(6)   | N(3)-Cu(1)-N(4) | 103.93(13) |
| O(5)-Zn(1)-N(2)                            | 173.94(6)  | N(1)-Cu(1)-N(4) | 92.55(13)  |
| O(1)-Zn(1)-N(1) <sup>i</sup>               | 102.34(6)  | N(5)-Cu(1)-O(1) | 95.95(13)  |
| N(3)-Zn(1)-N(1) <sup>i</sup>               | 160.85(6)  | N(2)-Cu(1)-O(1) | 89.76(12)  |
| O(4) <sup>i</sup> -Zn(1)-N(1) <sup>i</sup> | 76.46(6)   | N(3)-Cu(1)-O(1) | 88.61(12)  |
| O(5)-Zn(1)-N(1) <sup>i</sup>               | 85.81(6)   | N(1)-Cu(1)-O(1) | 75.09(12)  |
| N(2)-Zn(1)-N(1) <sup>i</sup>               | 92.55(7)   | N(4)-Cu(1)-O(1) | 166.71(11) |

symmetry code: <sup>i</sup> x, y, z+1

**S3.** Selected bond lengths (Å) and angles (°) for **5** and **6**

| <b>5</b>                      |            |                                |            | <b>6</b>        |            |
|-------------------------------|------------|--------------------------------|------------|-----------------|------------|
| Cu(1)-O(7)                    | 1.974(4)   | Cu(2)-O(4) <sup>ii</sup>       | 1.946(4)   | Cu(1)-N(3)      | 1.993(3)   |
| Cu(1)-O(1w)                   | 1.985(5)   | Cu(2)-N(3)                     | 2.022(5)   | Cu(1)-N(2)      | 2.006(3)   |
| Cu(1)-N(6)                    | 1.996(5)   | Cu(2)-N(4)                     | 2.024(5)   | Cu(1)-N(1)      | 2.177(3)   |
| Cu(1)-N(5)                    | 2.030(5)   | Cu(2)-N(1)                     | 2.093(5)   | Cu(1)-O(3)      | 2.203(3)   |
| Cu(1)-O(5) <sup>i</sup>       | 2.271(4)   | Cu(2)-O(1)                     | 2.300(4)   | Cu(1)-O(1)      | 2.294(3)   |
|                               |            | Cu(2)-O(8)                     | .547(8)    | Cu(1)-O(5)      | 1.966(3)   |
| O(7)-Cu(1)-O(1w)              | 90.52(18)  | N(3)-Cu(2)-N(4)                | 80.4(2)    | O(5)-Cu(1)-N(2) | 90.82(13)  |
| O(7)-Cu(1)-N(6)               | 94.3(2)    | O(4) <sup>ii</sup> -Cu(2)-N(1) | 91.81(18)  | N(3)-Cu(1)-N(2) | 81.35(14)  |
| O(1w)-Cu(1)-N(6)              | 174.7(2)   | N(3)-Cu(2)-N(1)                | 97.5(2)    | O(5)-Cu(1)-N(1) | 89.25(12)  |
| O(7)-Cu(1)-N(5)               | 151.59(18) | N(4)-Cu(2)-N(1)                | 168.23(19) | N(3)-Cu(1)-N(1) | 98.39(13)  |
| O(1w)-Cu(1)-N(5)              | 93.6(2)    | O(4) <sup>ii</sup> -Cu(2)-O(1) | 97.54(16)  | N(2)-Cu(1)-N(1) | 175.42(13) |
| N(6)-Cu(1)-N(5)               | 81.1(2)    | N(3)-Cu(2)-O(1)                | 89.07(18)  | O(5)-Cu(1)-O(3) | 90.29(12)  |
| O(1w)-Cu(1)-O(5) <sup>i</sup> | 93.06(17)  | N(4)-Cu(2)-O(1)                | 116.11(18) | N(3)-Cu(1)-O(3) | 94.47(13)  |
| N(6)-Cu(1)-O(5) <sup>i</sup>  | 87.36(18)  | N(1)-Cu(2)-O(1)                | 75.28(17)  | N(2)-Cu(1)-O(3) | 111.28(13) |
| N(5)-Cu(1)-O(5) <sup>i</sup>  | 99.24(17)  | O(4) <sup>ii</sup> -Cu(2)-N(4) | 89.6(2)    | N(1)-Cu(1)-O(3) | 73.30(11)  |
|                               |            | N(3)-Cu(2)-O(8)                | 92.29(19)  | O(5)-Cu(1)-O(1) | 91.87(12)  |
|                               |            | N(3)-Cu(2)-O(4)                | 169.73(24) | N(3)-Cu(1)-O(1) | 88.01(13)  |
|                               |            | N(4)-Cu(2)-O(8)                | 96.86(18)  | N(2)-Cu(1)-O(1) | 103.75(12) |
|                               |            | N(1)-Cu(2)-O(8)                | 71.60(15)  | N(1)-Cu(1)-O(1) | 71.67(11)  |
|                               |            | O(4)-Cu(2)-O(8)                | 86.47(16)  | O(3)-Cu(1)-O(1) | 144.87(10) |
|                               |            | O(1)-Cu(2)-O(8)                | 146.75(14) | O(5)-Cu(1)-N(3) | 171.90(12) |

symmetry code:<sup>i</sup> -x+1,-y+1,-z+2; <sup>ii</sup> -x+1,-y+1,-z+1.

**S4. Selected bond lengths (Å) and angles (°) for 7 and 8**

| 7               |            | 8               |            |
|-----------------|------------|-----------------|------------|
| Cd(1)-O(5)      | 2.294(4)   | Cd(1)-N(1)      | 2.239(2)   |
| Cd(1)-O(6)      | 2.304(4)   | Cd(1)-N(3)      | 2.285(2)   |
| Cd(1)-N(1)      | 2.351(4)   | Cd(1)-N(4)      | 2.315(2)   |
| Cd(1)-N(3)      | 2.374(4)   | Cd(1)-O(6)      | 2.3638(17) |
| Cd(1)-N(4)      | 2.393(4)   | Cd(1)-O(5)      | 2.3895(16) |
| Cd(1)-O(1)      | 2.458(3)   | Cd(1)-O(1)      | 2.4214(16) |
| Cd(1)-O(3)      | 2.469(4)   | Cd(1)-O(3)      | 2.5341(16) |
| O(5)-Cd(1)-O(6) | 170.93(12) | N(1)-Cd(1)-N(3) | 143.49(7)  |
| O(5)-Cd(1)-N(1) | 89.15(13)  | N(1)-Cd(1)-N(4) | 144.82(7)  |
| O(6)-Cd(1)-N(1) | 81.86(14)  | N(3)-Cd(1)-N(4) | 71.63(7)   |
| O(5)-Cd(1)-N(3) | 104.35(14) | N(1)-Cd(1)-O(6) | 82.19(6)   |
| O(6)-Cd(1)-N(3) | 83.77(15)  | N(3)-Cd(1)-O(6) | 90.38(6)   |
| N(1)-Cd(1)-N(3) | 143.56(15) | N(4)-Cd(1)-O(6) | 99.73(7)   |
| O(5)-Cd(1)-N(4) | 89.06(14)  | N(1)-Cd(1)-O(5) | 89.73(6)   |
| O(6)-Cd(1)-N(4) | 97.62(14)  | N(3)-Cd(1)-O(5) | 96.14(6)   |
| N(1)-Cd(1)-N(4) | 144.95(14) | N(4)-Cd(1)-O(5) | 86.89(7)   |
| N(3)-Cd(1)-N(4) | 70.17(15)  | O(6)-Cd(1)-O(5) | 171.92(5)  |
| O(5)-Cd(1)-O(1) | 85.06(13)  | N(1)-Cd(1)-O(1) | 67.73(6)   |
| O(6)-Cd(1)-O(1) | 92.48(13)  | N(3)-Cd(1)-O(1) | 76.82(7)   |
| N(1)-Cd(1)-O(1) | 67.19(13)  | N(4)-Cd(1)-O(1) | 146.51(6)  |
| N(3)-Cd(1)-O(1) | 80.22(14)  | O(6)-Cd(1)-O(1) | 91.32(6)   |
| N(4)-Cd(1)-O(1) | 147.32(14) | O(5)-Cd(1)-O(1) | 85.55(6)   |
| O(5)-Cd(1)-O(3) | 93.96(12)  | N(1)-Cd(1)-O(3) | 67.80(6)   |
| O(6)-Cd(1)-O(3) | 81.52(13)  | N(3)-Cd(1)-O(3) | 146.55(6)  |
| N(1)-Cd(1)-O(3) | 67.16(12)  | N(4)-Cd(1)-O(3) | 77.63(6)   |
| N(3)-Cd(1)-O(3) | 142.69(13) | O(6)-Cd(1)-O(3) | 81.96(6)   |
| N(4)-Cd(1)-O(3) | 78.06(13)  | O(5)-Cd(1)-O(3) | 95.06(5)   |
| O(1)-Cd(1)-O(3) | 134.35(12) | O(1)-Cd(1)-O(3) | 135.52(6)  |

**S5: Hydrogen-bonding contacts (Å, °) in complex 1.**

| D-H...A <sup>a</sup>       | <i>d</i> (D-H) | <i>d</i> (H...A) | <i>d</i> (D...A) | ∠(DHA) |
|----------------------------|----------------|------------------|------------------|--------|
| O6-H6A...O10 <sup>i</sup>  | 0.850          | 2.025            | 2.781            | 147.74 |
| O6-H6B...O9 <sup>i</sup>   | 0.852          | 1.958            | 2.807            | 174.42 |
| O7-H7B...O6 <sup>ii</sup>  | 0.856          | 1.928            | 2.774            | 169.75 |
| O8-H8A...O7 <sup>iii</sup> | 0.854          | 2.065            | 2.913            | 171.57 |
| O8-H8B...O10               | 0.856          | 2.016            | 2.865            | 171.76 |
| O9-H9A...O7 <sup>iii</sup> | 0.850          | 2.005            | 2.816            | 159.57 |
| O9-H9B...O8 <sup>iii</sup> | 0.852          | 1.988            | 2.800            | 159.11 |

<sup>a</sup> D = donor; A = acceptor.

Symmetry code: <sup>i</sup> x-1, y, z; <sup>ii</sup> x+1, y, z-1; <sup>iii</sup> x, -y+1/2, z+1/2.

**S6: Hydrogen-bonding contacts (Å, °) in complex 2.**

| D-H...A <sup>a</sup>        | <i>d</i> (D-H) | <i>d</i> (H...A) | <i>d</i> (D...A) | ∠(DHA) |
|-----------------------------|----------------|------------------|------------------|--------|
| O6-H6B...O7 <sup>i</sup>    | 0.840          | 2.494            | 2.954            | 115.46 |
| O7-H7A...O8                 | 0.855          | 1.998            | 2.840            | 168.32 |
| O7-H7B...O6 <sup>ii</sup>   | 0.850          | 2.119            | 2.954            | 167.24 |
| O8-H8A...O5 <sup>iii</sup>  | 0.859          | 1.934            | 2.783            | 169.56 |
| O9-H9A...O7 <sup>iv</sup>   | 0.851          | 2.034            | 2.865            | 165.29 |
| O9-H9B...O6 <sup>v</sup>    | 0.850          | 1.963            | 2.808            | 172.59 |
| O10-H10A...O8 <sup>vi</sup> | 0.861          | 2.029            | 2.864            | 163.21 |
| O10-H10B...O9               | 0.855          | 1.996            | 2.792            | 154.50 |

<sup>a</sup> D = donor; A = acceptor.

Symmetry code: <sup>i</sup>  $x+1/2, y, -z+1/2$ ; <sup>ii</sup>  $x-1/2, y, -z+1/2$ ; <sup>iii</sup>  $-x+1/2, y+1/2, z$ ; <sup>iv</sup>  $-x+1/2, y-1/2, z$ ; <sup>v</sup>  $-x+3/2, y-1/2, z$ ; <sup>vi</sup>  $-x+1, y-1/2, -z+1/2$ .

**S7: Hydrogen-bonding contacts (Å, °) in complex 4.**

| D-H...A <sup>a</sup>        | <i>d</i> (D-H) | <i>d</i> (H...A) | <i>d</i> (D...A) | ∠(DHA) |
|-----------------------------|----------------|------------------|------------------|--------|
| O7-H7A...O9 <sup>i</sup>    | 0.848          | 2.001            | 2.848            | 176.01 |
| O7-H7B...O8 <sup>i</sup>    | 0.850          | 1.979            | 2.826            | 173.51 |
| O8-H8A...O9 <sup>i</sup>    | 0.851          | 2.085            | 2.911            | 163.41 |
| O8-H8B...O6                 | 0.853          | 2.045            | 2.855            | 158.30 |
| O9-H9B...O10                | 0.851          | 1.979            | 2.811            | 165.51 |
| O10-H10A...O7 <sup>ii</sup> | 0.851          | 2.005            | 2.848            | 171.24 |
| O10-H10B...O6 <sup>ii</sup> | 0.850          | 1.984            | 2.798            | 160.04 |

<sup>a</sup> D = donor; A = acceptor.

Symmetry code: <sup>i</sup>  $x, -y+1/2, z+1/2$ ; <sup>ii</sup>  $x, y, z-1$ .

**S8: Hydrogen-bonding contacts (Å, °) in complex 5.**

| D-H...A <sup>a</sup>               | <i>d</i> (D-H) | <i>d</i> (H...A) | <i>d</i> (D...A) | ∠(DHA) |
|------------------------------------|----------------|------------------|------------------|--------|
| O(1W)-H(1WA)...O(5W) <sup>i</sup>  | 0.851          | 1.917            | 2.758            | 169.09 |
| O(2W)-H(2WA)...O(4W) <sup>ii</sup> | 0.851          | 1.980            | 2.785            | 157.59 |
| O(2W)-H(2WB)...O(5W)               | 0.850          | 2.035            | 2.883            | 175.12 |
| O(3W)-H(3WB)...O(3W) <sup>ii</sup> | 0.848          | 2.130            | 2.824            | 138.89 |
| O(4W)-H(4WB)...O(3W) <sup>ii</sup> | 0.850          | 1.892            | 2.740            | 175.03 |

<sup>a</sup> D = donor; A = acceptor.

Symmetry code: <sup>i</sup>  $-x+1, -y+1, -z+1$ ; <sup>ii</sup>  $-x, -y+1, -z+1$ .

**S9: Hydrogen-bonding contacts (Å, °) in complex 7.**

| D-H...A <sup>a</sup>       | <i>d</i> (D-H) | <i>d</i> (H...A) | <i>d</i> (D...A) | ∠(DHA) |
|----------------------------|----------------|------------------|------------------|--------|
| O5-H5A...O4 <sup>i</sup>   | 0.848          | 1.852            | 2.699            | 175.90 |
| O5-H5B...O2 <sup>ii</sup>  | 0.850          | 1.945            | 2.721            | 151.30 |
| O6-H6A...O2 <sup>iii</sup> | 0.849          | 2.009            | 2.768            | 148.38 |
| O6-H6B...O3 <sup>i</sup>   | 0.853          | 1.888            | 2.726            | 166.89 |

<sup>a</sup> D = donor; A = acceptor.

Symmetry code: <sup>i</sup>  $-x, -y+2, -z$ ; <sup>ii</sup>  $-x, -y+1, -z$ ; <sup>iii</sup>  $-x+1, -y+1, -z$ .

**S10:** Hydrogen-bonding contacts ( $\text{\AA}$ ,  $^\circ$ ) in complex **8**.

| D-H...A <sup>a</sup>       | <i>d</i> (D-H) | <i>d</i> (H...A) | <i>d</i> (D...A) | $\angle$ (DHA) |
|----------------------------|----------------|------------------|------------------|----------------|
| O5-H5A...O4 <sup>i</sup>   | 0.858          | 1.814            | 2.670            | 176.20         |
| O5-H5B...O2 <sup>ii</sup>  | 0.857          | 1.744            | 2.594            | 171.44         |
| O6-H6A...O2 <sup>iii</sup> | 0.836          | 1.859            | 2.686            | 169.69         |
| O6-H6B...O3 <sup>iv</sup>  | 0.845          | 1.922            | 2.759            | 171.22         |
| O6-H6B...O4 <sup>iv</sup>  | 0.845          | 2.645            | 3.299            | 135.30         |

<sup>a</sup> D = donor; A = acceptor.

Symmetry code: <sup>i</sup> -x+1, -y, -z+2; <sup>ii</sup> -x+1, -y+1, -z+2; <sup>iii</sup> -x, -y+1, -z+2; <sup>iv</sup> -x, -y, -z+2.

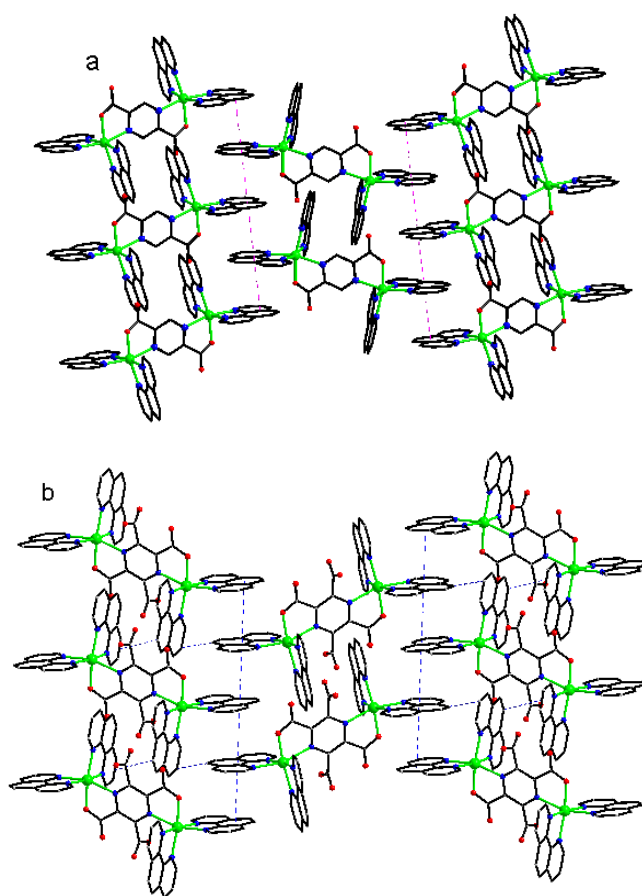

**S11:** Crystal structures of **1** (a) and **2** (b) showing  $\pi$ ... $\pi$  interactions (dashed lines). The hydrogen atoms are not shown for clarity.

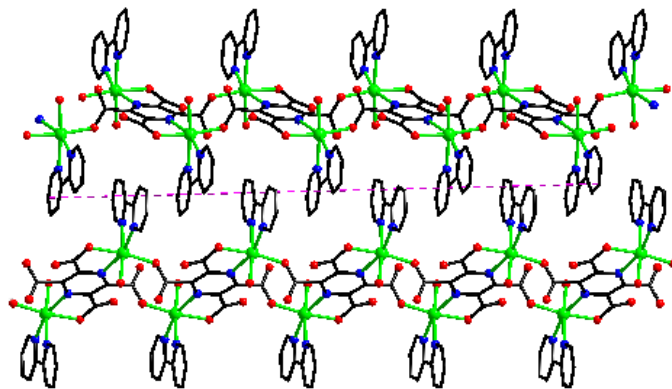

**S12:** Crystal structure of **3** showing  $\pi \cdots \pi$  interactions (dashed lines). The hydrogen atoms are not shown for clarity.

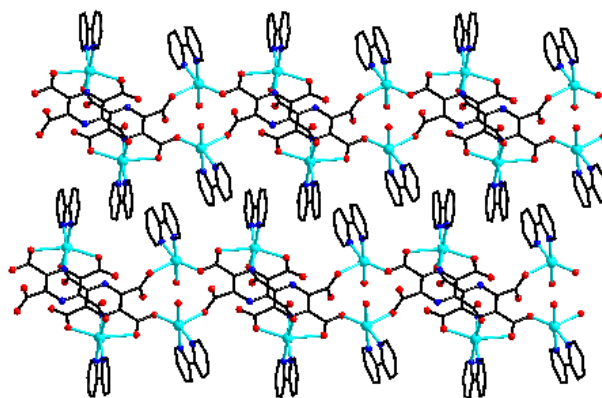

**S13:** Crystal structure of **5** showing  $\pi \cdots \pi$  interactions. The hydrogen atoms are not shown for clarity.
